# Supplementary material for: Targeting HPK1 inhibits neutrophil responses to mitigate post-stroke lung and cerebral injuries
Source: Springer Nature journal article supplement (doi:10.1038/s44321-025-00220-8), 2025-04-01
Supplement: MOESM12 [file 44321_2025_220_MOESM12_ESM.pdf]

## Expanded View Figures

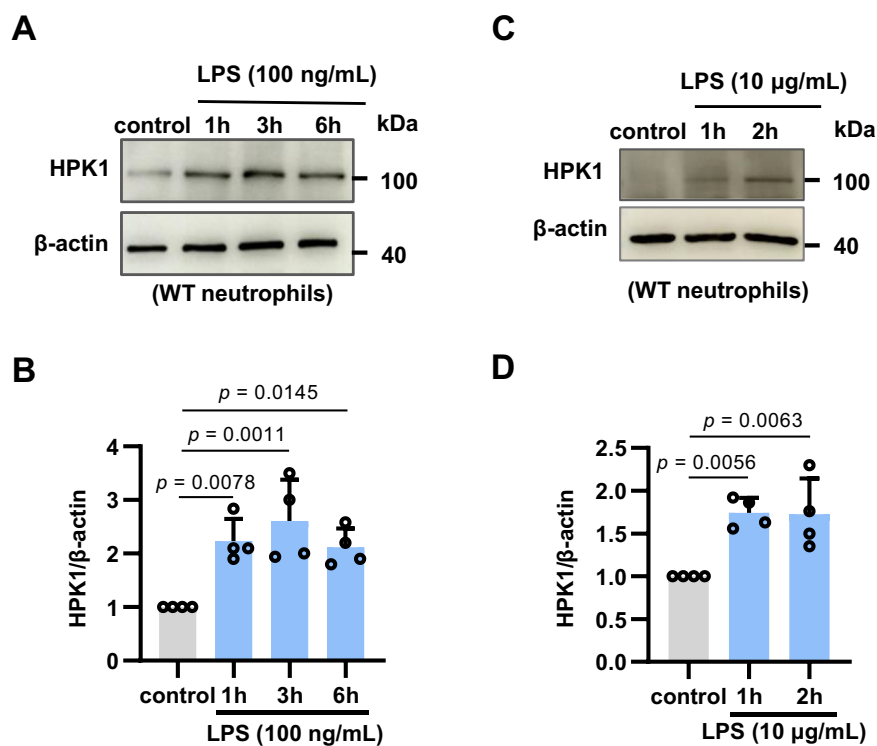

**Figure EV1. HPK1 levels increase in primary neutrophils after LPS treatment.**

(A, B) Representative HPK1 immunoblot (A) and quantification (B) in primary neutrophils from WT mice treated with LPS (100 ng/mL) for 1, 3, and 6 h.  $N = 4$  per group. (C, D) Representative HPK1 immunoblot (C) and quantification (D) in primary neutrophils from WT mice treated with LPS (10 μg/mL) for 1 and 2 h.  $N = 4$  per group. Bar graphs represent the mean  $\pm$  SD. One-way ANOVA in (B) and (D). Source data are available online for this figure.

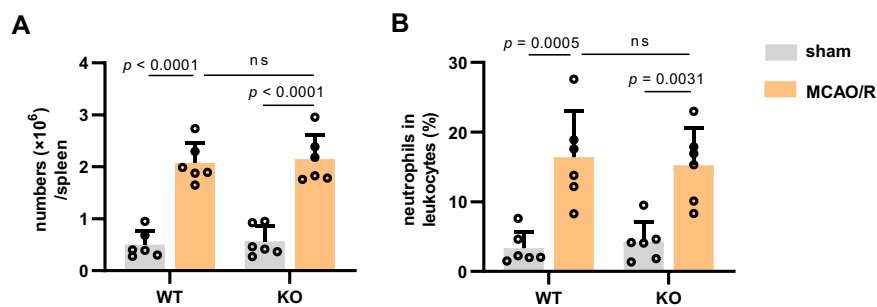

**Figure EV2. HPK1 loss has no influence on neutrophil population in the mouse spleen after ischemic stroke.**

(A, B) Flow cytometry analysis of the number (A) and frequency (B) of neutrophils in the spleen tissues of WT/KO mice after sham or MCAO/R for 24 h.  $N = 6$  mice per group. Bar graphs represent the mean  $\pm$  SD. ns, no significance. Two-way ANOVA in (A) and (B). Source data are available online for this figure.

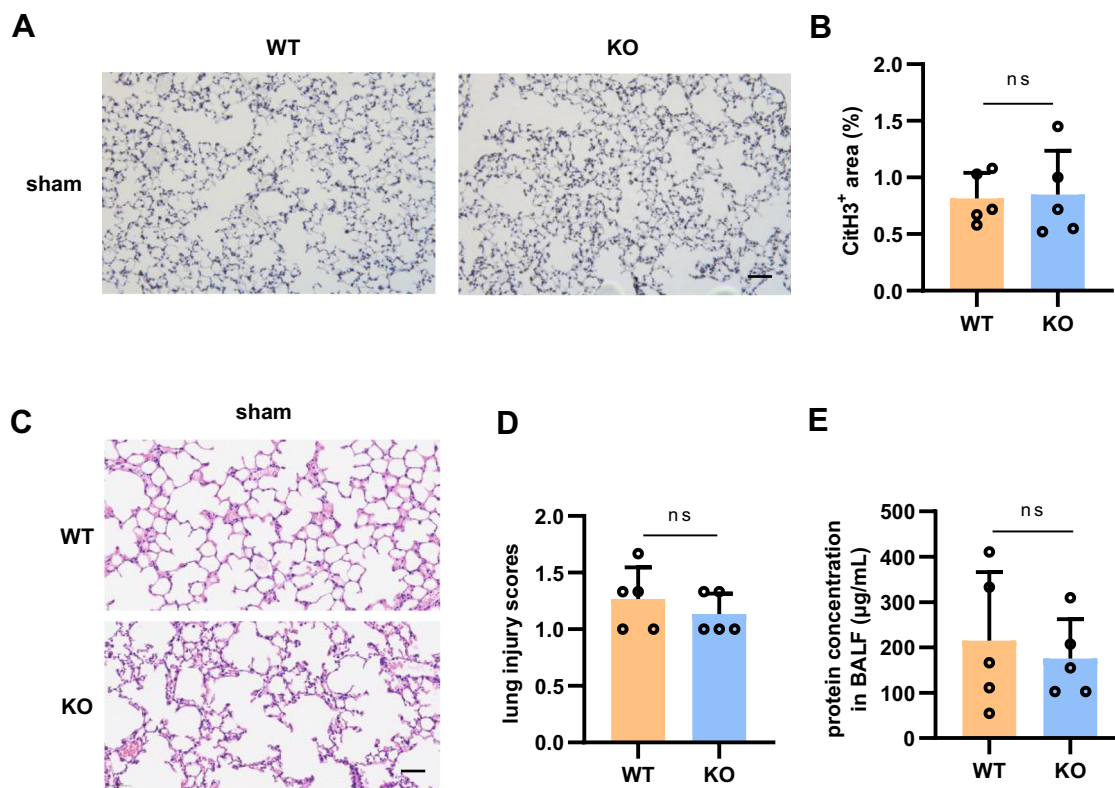

**Figure EV3. There are no marked NETs and lung injury in WT and HPK1 loss mice after sham operation.**

(A, B) Representative CitH3 immunohistochemical images (A) and quantification (B) in the lung sections from WT/KO mice after sham operation.  $N = 5$  mice per group. Scale bar = 50  $\mu\text{m}$ . (C, D) Representative HE staining (C) and histopathological scores (D) of lung sections from WT/KO mice after sham operation. Scale bar = 50  $\mu\text{m}$ .  $N = 5$  mice per group. (E) Protein concentration of BALF in WT/KO mice after sham operation.  $N = 5$  mice per group. Bar graphs represent the mean  $\pm$  SD. ns, no significance. Unpaired Student's  $t$ -test in (B), (D), and (E). Source data are available online for this figure.

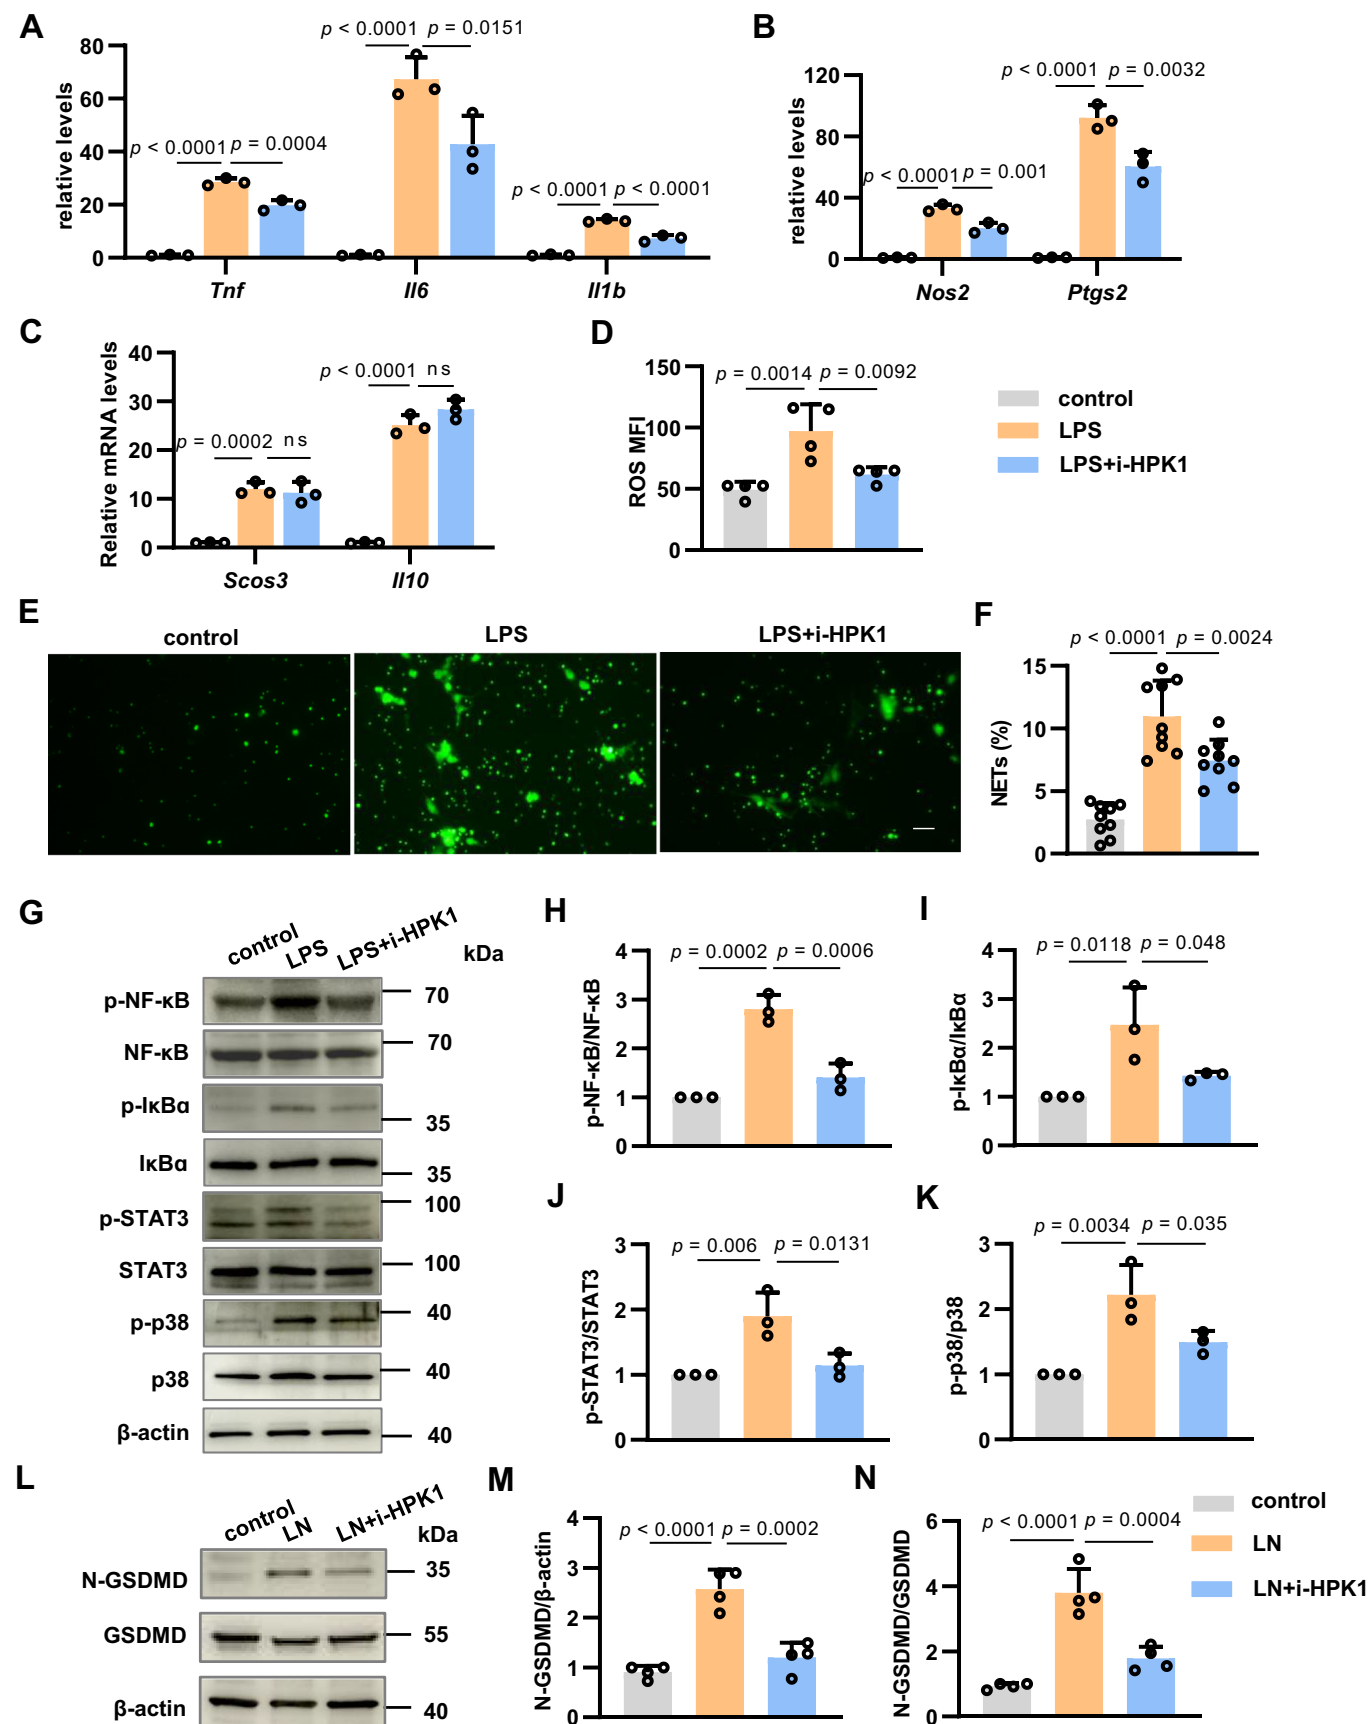

◀ **Figure EV4. Inhibiting HPK1 reduces LPS-induced hyperactivity and NF-κB/STAT3/p38/GSDMD pathways in primary neutrophils.**

(A–C) qPCR analysis of *Tnf*, *Il6*, and *Il1b* (A), *Nos2* and *Ptgs2* (B), *Socs3* and *Il10* (C) in WT neutrophils treated with LPS (100 ng/mL). *N* = 3 per group, three-time repeats. (D) Flow cytometry analysis of ROS levels (MFI) in WT neutrophils treated with LPS (100 ng/mL) for 3 h. *N* = 4 per group, three-time repeats. (E–F) Representative fluorescence imaging (E) and quantification (F) of NET formation. Neutrophils were stimulated with LPS (10 μg/mL) for 2.5 h, and NETs were visualized using SYTOX Green. Scale bar = 50 μm. *N* = 9 per group. (G–K) Representative immunoblot (G) of phosphorylation and total protein levels of NF-κB (H), IκBα (I), STAT3 (J), and p38 (K) in WT neutrophils treated with LPS (100 ng/mL). *N* = 3 per group. (L–N) Representative immunoblot (L) and quantification of GSDMD cleavage (N-GSDMD) levels (M) and N-GSDMD/GSDMD ratio (N) in WT neutrophils treated with LPS (500 ng/mL) and nigericin (LN). *N* = 4 per group. i-HPK1 was treated 30 min before LPS treatment. Bar graphs represent the mean ± SD. ns, no significance. One-way ANOVA in (A–D), (F), (H–K), (M), and (N). Source data are available online for this figure.

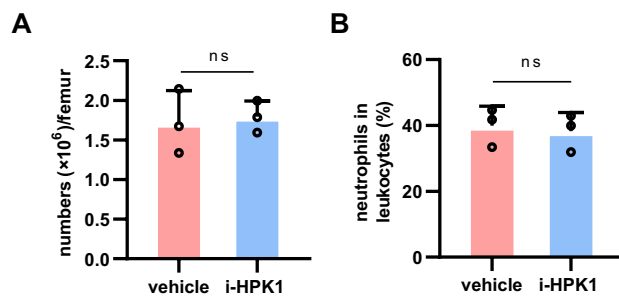

**Figure EV5. Inhibition of HPK1 has no influence on neutrophil release from bone marrow in mice after ischemic stroke.**

(A, B) Flow cytometry analysis of the number (A) and frequency (B) of bone marrow neutrophils in mice after MCAO/R for 24 h. Mice were treated with vehicle or i-HPK1 30 min after reperfusion following MCAO (90 min).  $N = 3$  mice per group. Bar graphs represent the mean  $\pm$  SD. ns, no significance. Unpaired Student's  $t$ -test in (A) and (B). Source data are available online for this figure.
